# Supplementary figures and images for: Exploration of Biomarkers of Psoriasis through Combined Multiomics Analysis
Source: Hindawi journal article supplement (doi:10.1155/2022/7731082), 2022-09-23

# Individuals – PCA

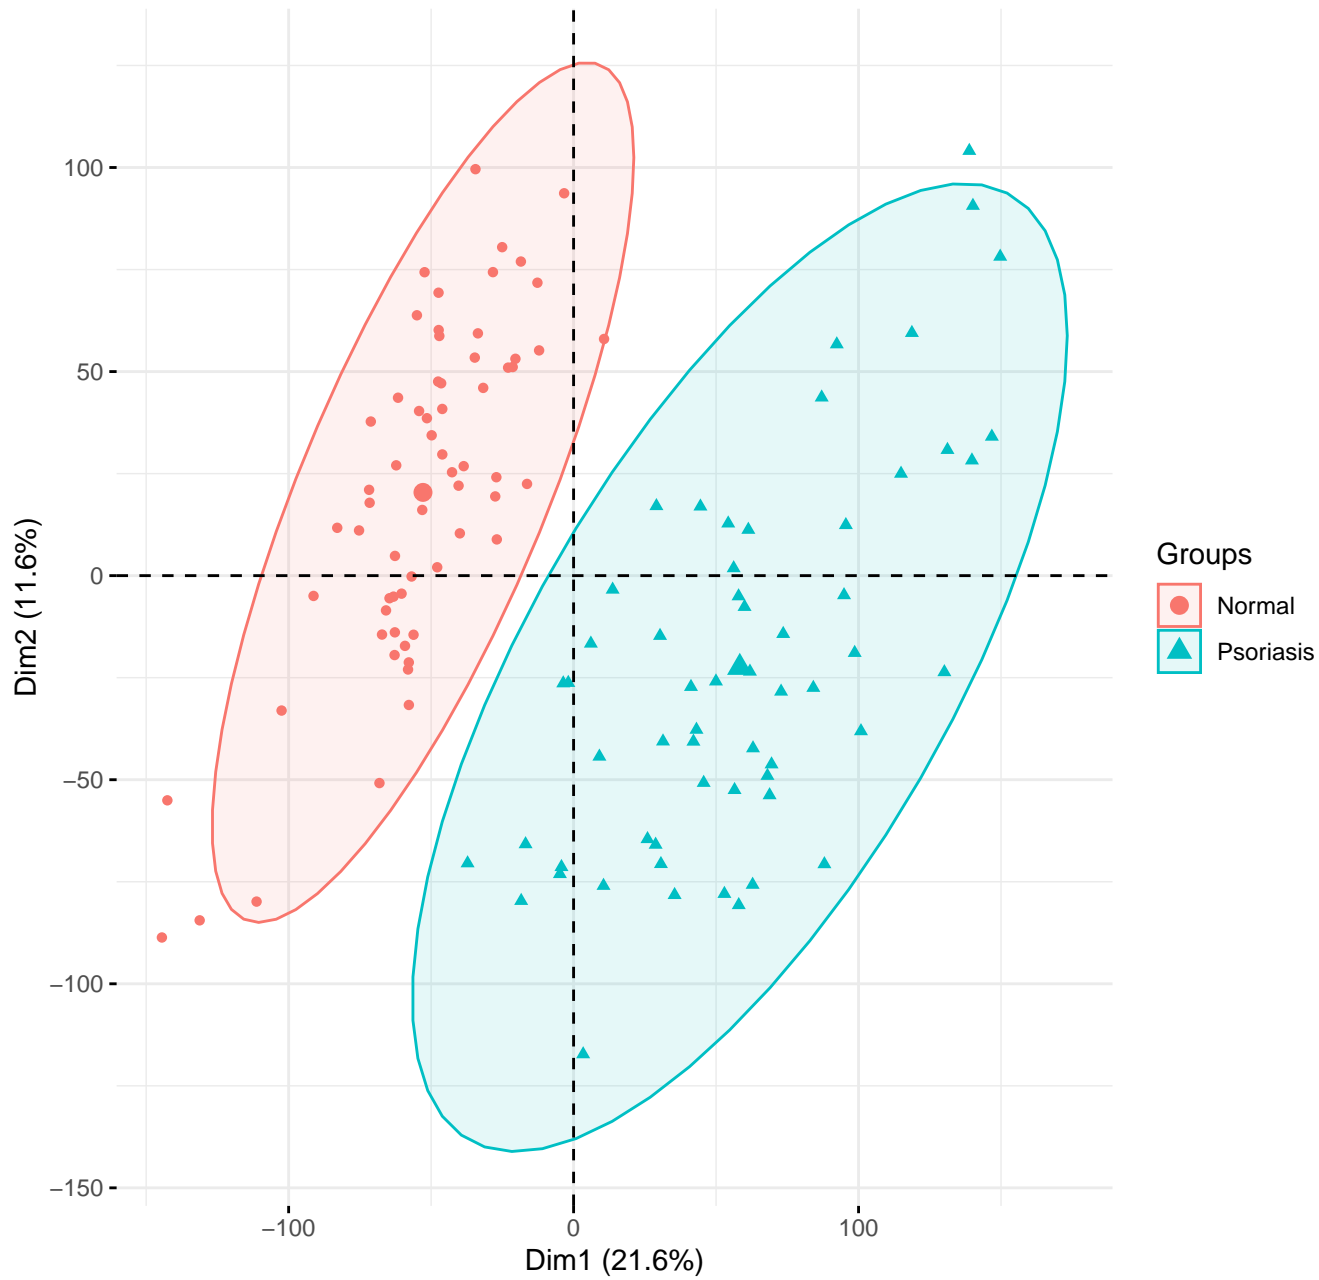

Supplement: f1 [file 7731082.f1.zip]
